# Molecular Response of Estuarine Fish to Hypoxia: A Comparative Study with Ruffe and Flounder from Field and Laboratory

Jessica Tiedke, Ralf Thiel, Thorsten Burmester\*

Institute of Zoology and Zoological Museum, University of Hamburg, Hamburg, Germany

## Abstract

On a global scale, the frequencies and magnitudes of hypoxic events in coastal and estuarine waters have increased dramatically over the past 20 years. Fish populations are suitable indicators for the assessment of the quality of aquatic ecosystems, as they are omnipresent and often comprise a variety of different lifestyles and adaptation strategies. We have investigated on the molecular level the impact of hypoxia on two fish species typical of European estuaries. We monitored the expression of eleven putatively hypoxia-responsive genes by means of quantitative real-time RT-PCR in brains, gills and hearts of the ruffe (*Gymnocephalus cernua*) and the flounder (*Platichthys flesus*). We first investigated the effect of naturally occurring hypoxia in the Elbe estuary. In a second approach, expression changes in the response to hypoxia were monitored under controlled laboratory conditions. The genes that showed the strongest effect were two respiratory proteins, myoglobin and neuroglobin, as well as the apoptosis enzyme caspase 3. As previously observed in other fish, myoglobin, which was considered to be muscle-specific, was found in brain and gills as well. Comparison of field and laboratory studies showed that – with the exception of the heart of flounder – that mRNA levels of the selected genes were about the same, suggesting that laboratory conditions reflect natural conditions. Likewise, trends of gene expression changes under hypoxia were the same, although hypoxia response was more pronounced in the Elbe estuary. In general, the flounder displayed a stronger response to hypoxia than the ruffe, suggesting that the flounder is more susceptible to hypoxia. The most pronounced differences were found among tissues within a species, demonstrating that hypoxia response is largely tissue-specific. In summary, our data suggest that laboratory experiments essentially mimic field data, but additional environmental factors enhance hypoxia response in nature.

**Citation:** Tiedke J, Thiel R, Burmester T (2014) Molecular Response of Estuarine Fish to Hypoxia: A Comparative Study with Ruffe and Flounder from Field and Laboratory. PLoS ONE 9(3): e90778. doi:10.1371/journal.pone.0090778

**Editor:** Marcelo Hermes-Lima, Universidade de Brasília, Brazil

**Received:** August 21, 2013; **Accepted:** February 5, 2014; **Published:** March 3, 2014

**Copyright:** © 2014 Tiedke et al. This is an open-access article distributed under the terms of the Creative Commons Attribution License, which permits unrestricted use, distribution, and reproduction in any medium, provided the original author and source are credited.

**Funding:** This study was supported by the Estuary and Wetland Research Graduate School Hamburg (ESTRADE) as member of the State Excellence Initiative (LEXI) funded by the Hamburg Science and Research Foundation. The funders had no role in study design, data collection and analysis, decision to publish, or preparation of the manuscript.

**Competing Interests:** The authors have declared that no competing interests exist.

\* E-mail: thorsten.burmester@uni-hamburg.de

## Introduction

Environmental hypoxia is an increasing problem worldwide with severe consequences for aquatic ecosystems. Oxygen supply in water bodies is generally mediated by the diffusion of atmospheric oxygen and by the production of the photoautotrophic plants algae and phytoplankton [1,2]. The concentration of dissolved oxygen (DO) depends on temperature, salinity and pressure. In shallow coastal areas and estuaries, environmental hypoxia has been increasing severely over the past decades [3]. These habitats are also characterised by various additional anthropomorphic stressors, such as hydro-morphological changes and excessive nutrient inputs as well as natural variations in turbidity and temperature, which might have synergistic impacts [4,5].

Typically, environmental hypoxia is defined when the DO is below 2 mg O<sub>2</sub>/l. Under these conditions, the first effects appear in most aquatic organisms [3,6]. Hypoxia mainly occurs during the summer months when the solubility of oxygen in water decreases due to the rising temperature. This effect is further enhanced by the stratification of the water column by formation of

thermo- and haloclines [7]. In addition, eutrophication, which is mainly caused by the input of nitrogen and other nutrients through anthropogenic activities, may further reduce the available level of DO [8]. In combination with an insufficient vertical mixing rate through stratification, this leads to bottom-water hypoxia, which is common in estuaries [6,9,10,11].

The Elbe is one of the longest European rivers (1,094 km) with a catchment area of ~144,000 km<sup>2</sup> that is dominated by agricultural land use [12]. The 140-km-long estuary is an important waterway and includes the harbour of the metropolitan region of Hamburg (Fig.1). These particular and permanently changing physical and chemical characteristics make the estuaries one of the most challenging environments for animal life [13]. Nevertheless, 78 fish species occur in the Elbe estuary, which is thus one of the most species-rich European estuaries [14]. In the last decades, the decreasing DO levels caused by the increased environmental temperature have additionally gained in severity due to a reduction of the surface/volume ratio by the deepening of the Elbe estuary for commercial shipping [14]. The oxygen budget of the Elbe estuary temporarily improved by reprocessing facilities and reduction of industrial sewage discharges after the German

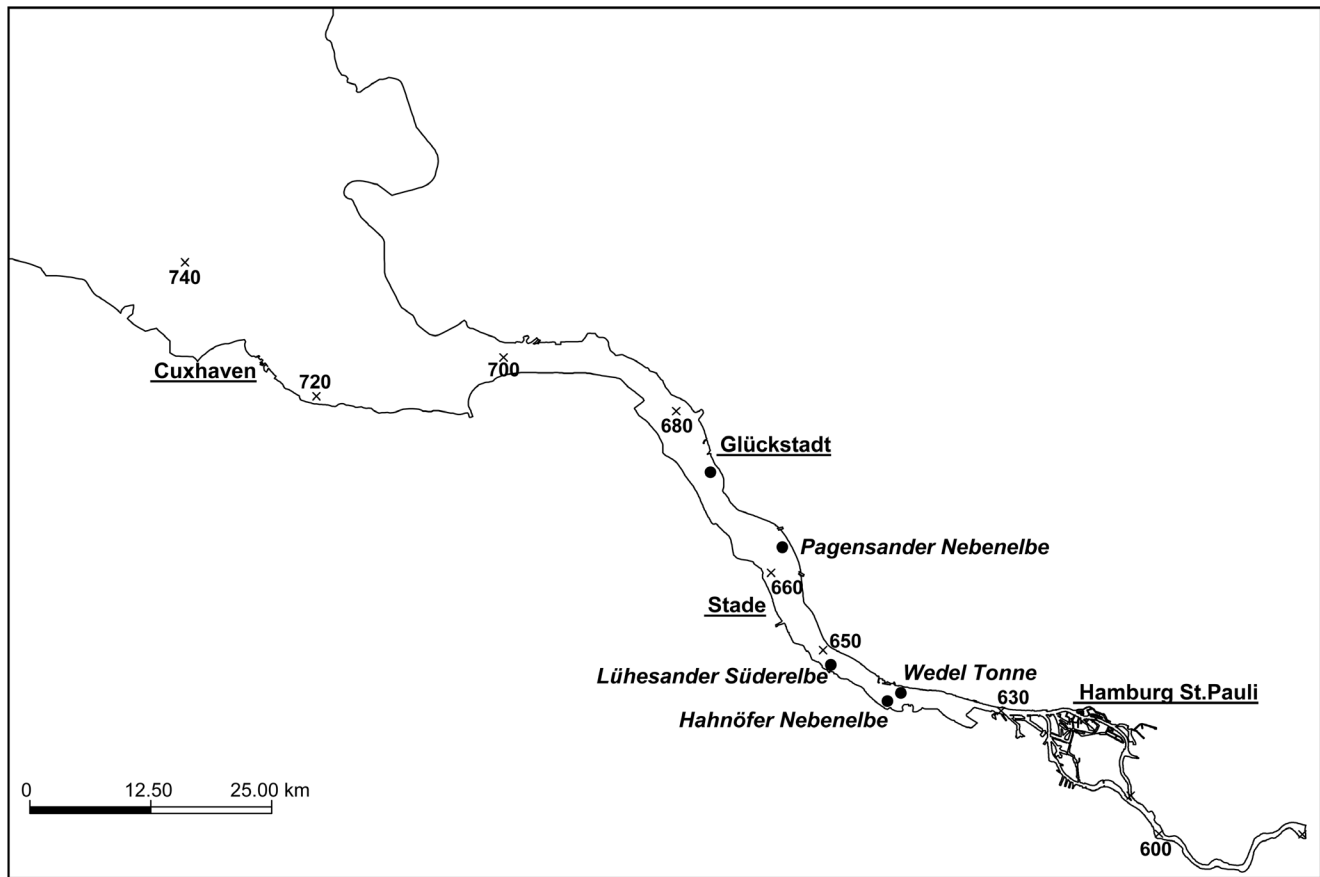

**Figure 1. Map of the 140 km long Elbe estuary between Hamburg and Cuxhaven.** Underlined names are cities along the estuary used as benchmarks. Names in italics identify the five sampling sites, which are additionally marked by black dots. Modified from Eick [99].  
doi:10.1371/journal.pone.0090778.g001

reunification. However, in recent years dredging of the river bed has led to the recurrence of seasonal oxygen shortage in the Elbe estuary [15,16].

The ectothermic and aerobic lifestyle of fish makes them in principle very susceptible to rising temperatures and decreased oxygen availability [17,18]. This is also reflected by a large number of hypoxia-tolerant fish species that have emerged during evolution. On the behavioural level, fish may decrease their energy demands e.g. by reducing the swimming activity or avoidance of hypoxic areas by vertical or horizontal migration [19,20]. On the morphological and physiological levels, some species have evolved specific adaptations that help them cope with hypoxic periods. These adaptations include, for example, the apoptosis-based expansion of the gill surface, the counter-current oxygen exchange and the increased oxygen affinity of fish haemoglobin, resulting in oxygen extraction efficiencies of 50–90% [21,22,23,24]. On the molecular level, various fish species show the typical cellular responses which depend on the activation of the hypoxia-inducible transcription factor (Hif-1) or are part of the conserved cellular stress response [25].

The dramatically increased frequencies and magnitudes of hypoxic events in the past ~20 years, are suspected to have major impact on the biodiversity of fish populations, leading to growing interest in better understanding the particular impact on fish physiology [9]. Here, we have investigated the response to seasonal hypoxia in the tidal Elbe of two typical estuarine fish species: the ruffe (*Gymnocephalus cernua*), which is an omnipresent species in

temperate regions of Europe and northern Asia, and the European flounder (*Platichthys flesus*), which additionally is of commercial interest. Flounder and ruffe have divergent life histories and therefore may have assumed different adaptation to hypoxic periods. The flounder is a demersal fish with a mainly sedentary lifestyle, which lives in shallow coastal waters and estuaries [26,27]. The ruffe is a more active predator, which inhabits freshwaters as well as brackish waters of rivers, lakes, and tidal estuaries [27,28]. In general, it is assumed that sustained swimmers are more sensitive to oxygen deprivation than benthic/pelagic species that more regularly encounter low oxygen in their environment [29].

In this study, we characterized the species and tissue-specific hypoxia response by measuring mRNA levels of selected stress-response genes, such as members of the anaerobic energy metabolism, oxidative stress defence and oxygen supply. Effects of hypoxia were monitored in three tissues (gills, brain and heart). To evaluate the impact from the more complex environment of the Elbe estuary, we additionally conducted controlled hypoxia experiments in the laboratory.

## Materials and Methods

### Ethics Statement

Eurasian ruffe (*G. cernua*) and flounder (*P. flesus*) were collected with a commercial fishing vessel. No permit was required for commercial fishing. Both species are neither endangered nor protected. The experimental procedures for handling and killing of

fish specimens were approved by the Hamburg authorities (Behörde für Soziales, Familie, Gesundheit und Verbraucherschutz, License No. 04/10).

### Field sampling

Adult ruffe (*G. cernua*) and flounder (*P. flesus*) were collected from five different sites in the Elbe estuary in Germany (Glückstadt, Pagensander Nebeneibe, Lühesander Süderelbe, Hahnöfer Nebeneibe, and Wedel Tonne; Fig. 1) during August and October of 2010 with a stow net cutter with a mesh size of 8 mm in the cod end. The DO and temperature data were taken at the beginning and end of each stow net haul with a multimode probe U 50 (Horiba, Japan). For each haul both values were averaged for further studies. In August, DO values correspond to mild hypoxia in Glückstadt (6.5 mg/l) and moderate hypoxia between Pagensander Nebeneibe (5.0 mg/l) and Wedel (4.2 mg/l) with an average water temperature of 23°C (Table 1). No sampling site showed severe hypoxic conditions (<2 mg/l). In October DO values in Glückstadt remained nearly saturated with 8.8 mg/l with an average water temperature of 14.7°C. After fishing adult flounders and ruffes were immediately collected from the fish haul without unnecessary suffering of the animals and divided into two groups. The group of specimen for laboratory experiments was maintained in the livewell, which was consistently provided with fresh aerated water from the surrounding, to ensure species-appropriate transport conditions. The field study group was instantly anesthetized in ice-cold water to prevent discomfort and pain right before killing by cutting the spinal cord and the aorta dorsalis. Dissected gill, brain and heart (atrium, ventricle) tissues were stored in RNAlater. The other fish specimens were used for laboratory experiments.

### Laboratory hypoxia treatments and tissue sample preparation

For controlled hypoxia experiments in the laboratory, ruffe and flounder were acclimated for at least four weeks in a 750-litre aquarium with freshwater at 11°C and with a day/night light cycle of 11.5/12.5 h. During acclimation, individuals were fed daily with the common earthworm (*Lumbricus terrestris*). Hypoxia treatments were carried out in a 100-litre tank at 11°C for 48 h using four adult individuals for each hypoxic condition: severe hypoxia (1.5±0.1 mg/l DO), moderate hypoxia (3.5±0.1 mg/l DO), mild hypoxia (5.2±0.1 mg/l DO) and normoxia (11.0±0.1 mg/l DO). For the calculation of the oxygen concentrations used for laboratory hypoxia experiments we used the average oxygen content measured during different seasons in the Elbe estuary. To ensure comparability of field sampling and laboratory experiments in spite of temperature differences the oxygen concentrations were calculated by percentage based on

normoxia corresponding to 100% of dissolved oxygen (personal communication D. Eick and the past two years; BMU, 2010) (Table 1). Hypoxic conditions were reached in the aquaria within 1 h. Oxygen concentrations were measured using the Oxi 340i sensor (WTW, Weilheim, Germany). Hypoxic conditions were adjusted using the Roxy-1 controller (Sable Systems, Las Vegas, Nevada, USA), which was connected to a source of gaseous nitrogen. During hypoxia treatments fish were not given any food. After hypoxic treatments the animals were anesthetized and killed as mentioned above. Gills, brains and hearts were excised and immediately frozen in liquid nitrogen.

### RNA isolation and reverse transcription-polymerase chain reaction (RT-PCR)

For preparation of RNA, fresh tissue was ground to a fine powder in liquid nitrogen using a mortar and pestle. Total RNA was isolated with peqGOLD TRIfast™ (Peqlab, Erlangen, Germany) in combination with the RNeasy® Mini Kit and including an on-column digestion with RNase-free DNase (Qiagen, Hilden, Germany). Total RNA was quantified spectrometrically with the Nanodrop ND 100 UV-Vis spectrometer (Thermo Scientific, Bonn, Germany). RNA integrity was checked by using formaldehyde agarose gel electrophoresis. cDNA was synthesised with 1.5 µg total RNA using oligo-(dT)<sub>18</sub> nucleotides and SuperScript™ III Reverse Transcriptase (Invitrogen, Karlsruhe, Germany) according to the manufacturer's protocol.

### Sequence identification of genes of interest and specific primer design

Genes of interest (GOI) were amplified using degenerate oligonucleotides, which had been designed according to aligned nucleotide sequences from various members of Perciformes and Pleuronectiformes (Table S1). Amplification was performed via gradient PCR using 40 amplification cycles (95°C 1 min, 48°C–55°C, 45 sec, 72°C 1 min, 72°C 10 min). PCR fragments were cloned into the pGEM-T easy cloning vector (Promega, Mannheim, Germany) and sequenced by a commercial service (GATC, Konstanz, Germany). The sequences were then used for the design of specific primers. After amplification, the cDNA fragments of the GOI (80 to 200 bp) (Table S2) were cloned and sequenced. The recombinant plasmids with the GOI were used for the standard curves in qRT-PCR.

### Quantitative real-time RT-PCR

Quantitative real-time RT-PCR (qRT-PCR) experiments were carried out with an ABI 7300 Real-Time PCR system. The ABI Power SYBR Green Master Mix (Applied Biosystems, Darmstadt, Germany) was applied with a two-step protocol. We used cDNA

**Table 1.** Comparison of oxygen concentrations in the Elbe estuary and in laboratory experiments.

| Condition        | Elbe estuary              |         |                       |        | Laboratory            |        |
|------------------|---------------------------|---------|-----------------------|--------|-----------------------|--------|
|                  | Sampling site (stream km) | Time    | O <sub>2</sub> (mg/l) | T (°C) | O <sub>2</sub> (mg/l) | T (°C) |
| mild hypoxia     | Glücksstadt (674)         | August  | 6.5                   | 23     | 5.2                   | 12     |
| moderate hypoxia | Pagensand NE (662)        | August  | 5.0                   | 23     | 3.6                   | 11     |
|                  | Wedel (638)               | August  | 4.2                   | 23.6   |                       |        |
| severe hypoxia   | --                        | --      | --                    | --     | 1.5                   | 11     |
| normoxia         | Glücksstadt (674)         | October | 13                    | 4      | 11                    | 11     |

doi:10.1371/journal.pone.0090778.t001

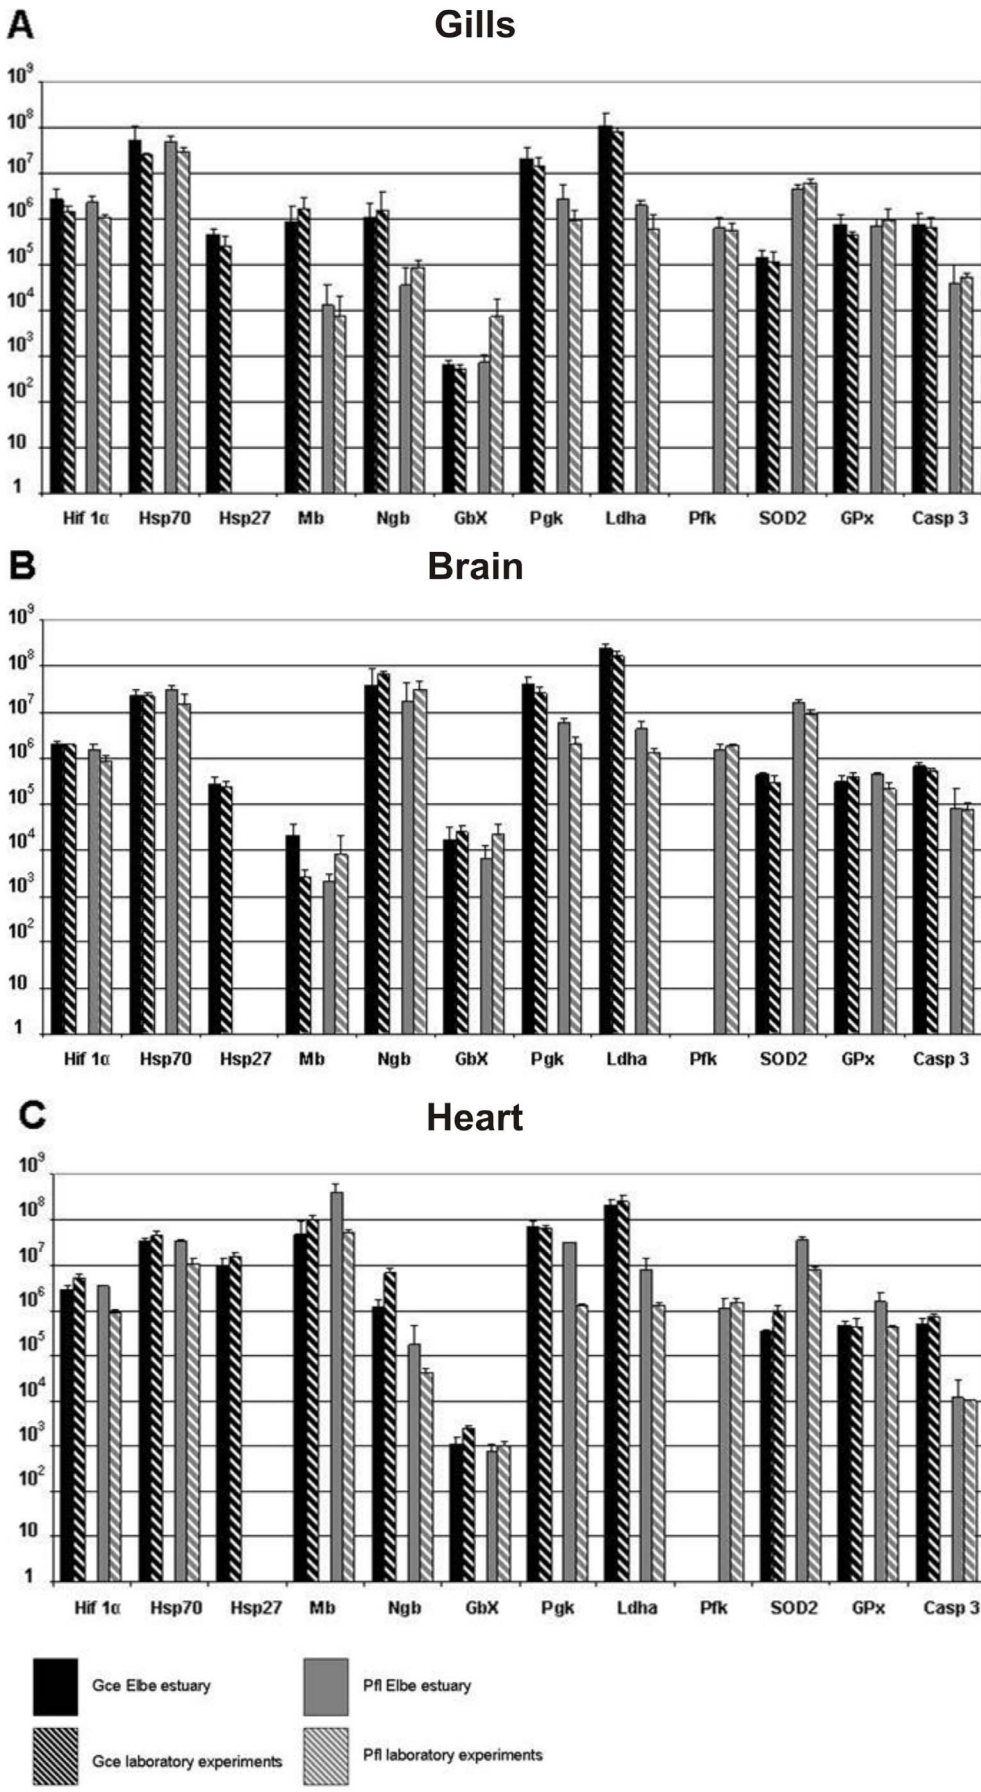

**Figure 2. Interspecies and experimental site comparison of total mRNA copy numbers of putatively hypoxia responsive genes in ruffe and flounder under normoxic condition analysed in (A) gills, (B) brain and (C) heart.** All expression levels are referred to 1  $\mu\text{g}$  mRNA. qRT-PCR results from the Elbe estuary are represented in black columns for ruffe and grey columns for flounder. Dashed columns indicate qRT-PCR results from laboratory experiments with black background for ruffe and grey background for flounder, respectively. Note that the y-axis has a logarithmic scale. Bars indicate standard deviation (SD). Asterisks indicate significance at  $p < 0.05$ .  $N = 3$  individuals for results from Elbe estuary for each data point.  $N = 3$  (analysed with a nested experimental design) for results from laboratory for each data point. doi:10.1371/journal.pone.0090778.g002

equivalent to 37.5 ng total RNA for each reaction. Eleven putatively stress-regulated genes (hypoxia inducible factor 1  $\alpha$ , Hif1 $\alpha$ ; heat shock protein 70, Hsp70; heat shock protein 27, Hsp27; myoglobin, Mb; neuroglobin, Ngb; globin X, GbX; lactate dehydrogenase, Ldh; phosphoglycerate kinase, Pkg; superoxide dismutase 2, Sod2; caspase 3, Casp3; glutathione peroxidase, GPx) were investigated. The reference genes,  $\beta$ -Actin ( $\beta$ -Act), ribosomal protein large P0-like protein (Rplp0) and elongation factor 1 $\alpha$  (Efl $\alpha$ ), were employed as putatively non-regulated controls. qRT-PCR was carried out with a standard cycling protocol using 40 amplification cycles (95°C 10 min, 95°C 15 sec, 60°C 15 sec; 72°C 30 sec). Success and specificity of amplification was evaluated using dissociation curves with a temperature range from 60°C to 95°C. All reactions were performed in triplicates. For standard curves, duplicates were run using tenfold serial dilutions ( $10^6$ – $10^2$ ) of recombinant plasmids representing GOI.

### Evaluation of qPCR data

We used a clustered structure to analyse gene expression changes: Three biological replicates of each species and tissue were employed. The samples were split into two RT reactions and we finally used three replicates in qRT-PCR (modified according to [30]). First evaluation of qRT-PCR data was performed with the ABI 7300 Sequence Detection software V.1.3.1 (Applied Biosystems). Reaction efficiency was determined by the slope of the standard curve for each gene. For evaluation of relative expression levels with the  $-\Delta\Delta\text{Ct}$  method [31], mean values of all triplicates were used. Calculations were carried out with Microsoft Office Excel XP. The data were further evaluated with IBM SPSS Statistics 20. The distribution of variables and the equality of variances were determined using the Kolmogorov-Smirnoff test and Levene's test, respectively. In case of homogenic variances, one-way ANOVA followed by Dunnett's t-test was applied, whereas in the case of heterogeneity a one-way ANOVA using the Games-Howell correction for post-hoc analysis was performed (Table S3A–C). To further evaluate the overall effect of field versus laboratory experiments and species specificity on gene expression, we performed a multivariate analysis of variance (MANOVA). We used the Pillai trace statistic, which is robust even with small sample sizes [32]. The MANOVA contained the effects of the setups (field versus laboratory) for ruffe and the effect of species specificity within a tissue and referred to one hypoxic condition (Table S4).

## Results

We investigated the molecular response to hypoxia in the ruffe and in the flounder by qRT-PCR employing a set of genes that represent a broad range of cellular functions. First, we obtained the partial coding sequences of the GOI (Table S2), with the exception of Hsp27 from the flounder, for which no specific cDNA could be amplified. Evaluation of the mRNA levels of the three putative reference genes (see above) revealed that RPLP0 expression was not affected by the hypoxic conditions in both species. Thus, RPLP0 was used for the normalisation of the qRT-PCR data.

For each field site and experimental laboratory condition, groups of three fishes were used. Each tissue sample was used for two independent extractions. Thus each expression data set corresponds to three biological with two technical replicates each ( $n = 3 \times 2$ ).

### Gene expression in ruffe and flounder under normoxia

Under normoxic conditions (defined in our experimental setup as 13 mg/l DO at 4°C in the Elbe estuary and  $11.0 \pm 0.1$  mg/l DO at 11°C in the laboratory), there were essentially no significant differences in terms of total mRNA copy numbers in both species (Fig. 2).

As expected, we found the highest level of Mb, which is the typical respiratory protein of the striated muscles [33] in the hearts ( $\sim 10^8$  copies per  $\mu\text{g}$  total RNA). Likewise, mRNA levels of the neuronal respiratory protein Ngb [34,35] were highest in the brains ( $\sim 10^8$  copies per  $\mu\text{g}$  total RNA). Nevertheless, minor amounts of Mb mRNA were also observed in gills and brains as well as Ngb mRNA in gills of both species.

Interspecies comparison revealed significant differences in the total copy numbers of some genes. In particular, transcript levels of Mb and Ngb were markedly different between species and tissues. For example, while we found approximately the same amounts of Mb and Ngb in the brains of the flounder and the ruffe ( $\sim 10^8$  copies/ $\mu\text{g}$ ), in the gills of the ruffe the levels of these two genes exceeded those measured in the flounder by at least two orders of magnitude (Fig. 2A and 2B). Ngb copy numbers were twofold higher in the hearts of the ruffe than in the flounder (Fig. 2C). Likewise, the levels of Ldha, Pkg and Casp3 were on average about tenfold higher in the tissues of the ruffe whereas the copy numbers of Sod2 were higher in tissues of the flounder (about 40-fold on average) (Fig. 2). Absolute expression levels of Hsp27 were about 15-fold higher in the heart of the ruffe compared to the gills and brains (Fig. 2).

A comparison of mRNA copy numbers in specimens from laboratory experiments and field studies showed that there are surprisingly little differences. Only in the flounder were significantly higher mRNA levels of Mb, Ldha, Pkg and Sod2 observed in the hearts of individuals taken from the Elbe estuary. By contrast, we found significantly higher Mb mRNA levels in the brains of the ruffe kept under laboratory conditions, although the total amount of Mb mRNA was low in this tissue.

### Gene expression changes under hypoxic conditions

Interspecies comparisons indicated that the changes of gene expression levels under hypoxic conditions were more pronounced in the flounder in tissues. Here, 51% of all collected data points (ten genes/three hypoxic stages/three tissues) showed  $\geq$  twofold regulation, of which 12% were statistically significant. In the ruffe, only 32% of data points (11 genes and five hypoxic stages/three tissues) with  $\geq$  twofold regulation were found, of which 22% were significant (Fig. 3). A comparison of the responses between tissues showed the same tendencies in gene expression changes in gills of both species (Fig. 3 and 4 A and D). In the ruffe, the gills were the most stress-responsive tissue, with 49% of data points showing a  $\geq$  twofold regulation (43% in the flounder) (Fig. 3 and 4 A and D).

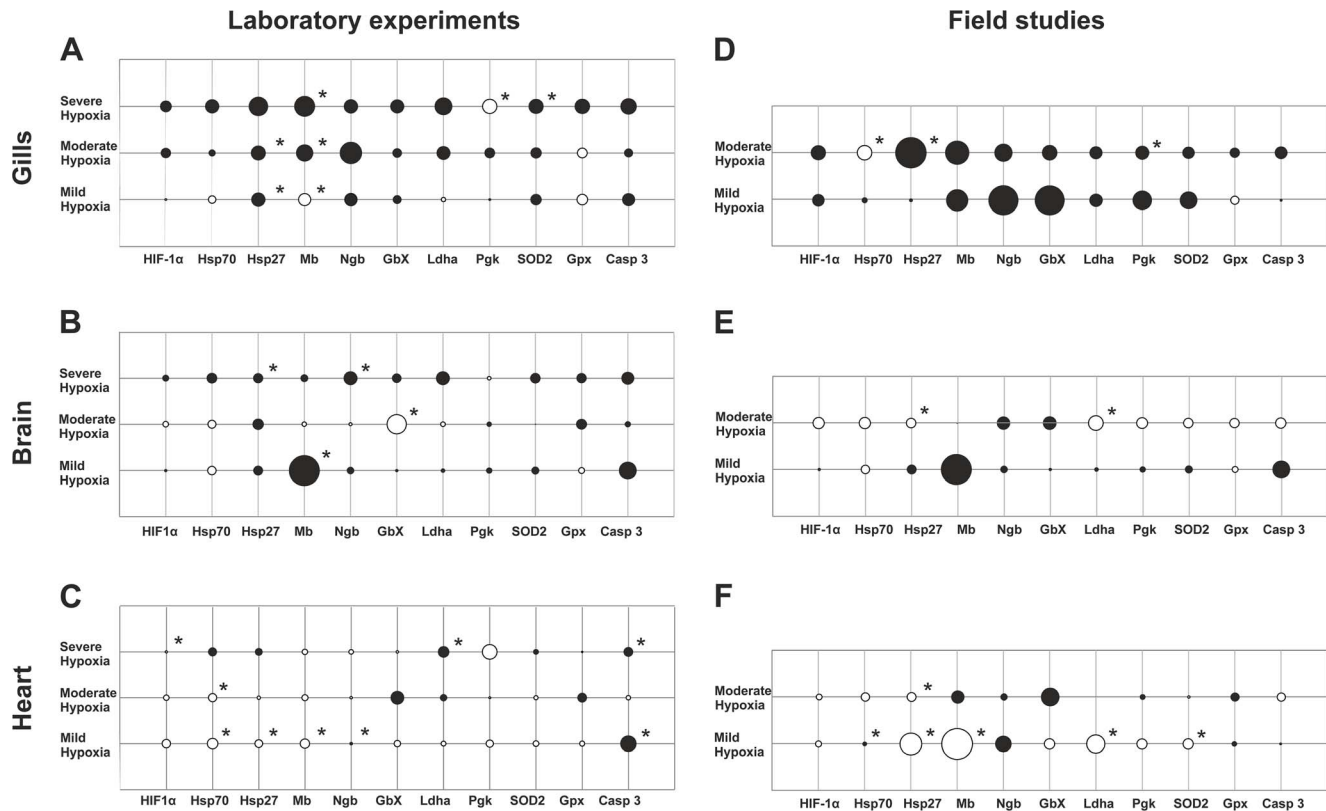

**Figure 3. Bubble charts of relative expression patterns of putatively hypoxia responsive genes in ruffe under different hypoxic conditions in laboratory experiments (A, B and C) and in the Elbe estuary (C, D and E).** Evaluation of qRT-PCR results was performed with  $\Delta\Delta$  CT method by use of RPLP0 as a reference gene. All results of relative expression levels are represented in log base 2. The diameter of bubbles indicates the magnitude of gene expression. Black bubbles represent expression levels  $>0$ , pen bubbles represent expression levels  $<0$ , and crossing lines without a bubble signify no change in the expression level. Asterisks indicate significance at  $p < 0.1$ . We analysed the expression pattern in three tissues of ruffe: (A) and (D) gills, (B) and (E) brain and (C) and (F) heart. For more details see Table S2. doi:10.1371/journal.pone.0090778.g003

By contrast, in the flounder we found the strongest changes in the hypoxic brain with 56% of data points having a  $\geq$  twofold regulation (20% in the ruffe) (Fig. 3 and 4 B and E). While we found as few as 20% of the data points regulated in the hearts of the ruffe, about 53% were found in the flounder (3 and 4 C and F). Notably, comparison of the data from both setups suggests that the overall response to hypoxia is more pronounced in samples taken from the Elbe estuary (Fig. 3 and 4). We used MANOVA for the evaluation of an overall effect of both setups and species specificity on the expression of all genes. We found no significant effect of the setups on gene expression. The MANOVA approach on the species specificity showed no significant effect in hearts, but the statistical tests in the gills and brains, however showed a significant effect in terms of moderate and severe hypoxia (Table S4).

### Analysis of putative stress-response genes in ruffe and flounder

Enhanced mRNA levels of the transcription factor Hif1 $\alpha$  were observed in the gills of the ruffe from both setups (Fig. 3 A and D), and in brains, gills and hearts of the flounder under severe hypoxia in the laboratory (Fig. 4. A, B and C). Field study results showed that mRNA levels were slightly elevated in the gills of the ruffe, but rather unaffected in the flounder (Fig. 3 and 4 A and D). In the hearts and in the brains of both species from the field studies no clear trend was observed (Fig. 3 and 4 C and F).

Expression changes of the molecular chaperone Hsp70 were stronger in the flounder than in the ruffe. The flounder gills showed the strongest response (up to threefold upregulation) (Fig. 4 A). In the ruffe, Hsp70 expression was essentially unaffected by mild hypoxia (Fig. 3). However, under laboratory conditions severe hypoxia causes enhanced Hsp70 levels in all tissues of both fish species. As mentioned, Hsp27 sequences could only be obtained from the ruffe. In the gills of this fish, Hsp27 levels were found to be significantly enhanced at all hypoxic conditions in the field and in the laboratory (up to  $\sim$ 50-fold) (Fig. 3A–E). In the other tissues, the effects were minor, with the notable exception of significantly lower Hsp27 levels in the hearts (Fig. 3C).

We included three globins in our studies with putatively divergent functions: Mb, Ngb and GbX [33,34,36]. Hypoxia causes increased levels of the three globins in the gills of both species (all hypoxic conditions; both experimental sites) (Fig.3 and 4; Fig. 5). In this tissue Mb displayed the strongest response to hypoxia, with significantly higher levels in the ruffe (up to tenfold) and up to 160-fold in the flounder in the samples from the Elbe (Fig. 3 and 4 A and D). Interestingly, we also found an up to 200-fold increased Mb level in the brains of the flounder (moderate hypoxia; field studies) and laboratory experiments (severe hypoxia; up to ninefold) (Fig. 3 and 4 B and E; Fig. 5). However, in the hearts, which have high endogenous Mb levels, there is no upregulation of Mb mRNA. Rather, we found the Mb levels unchanged, or even more significantly, up to 100-fold lower (ruffe:

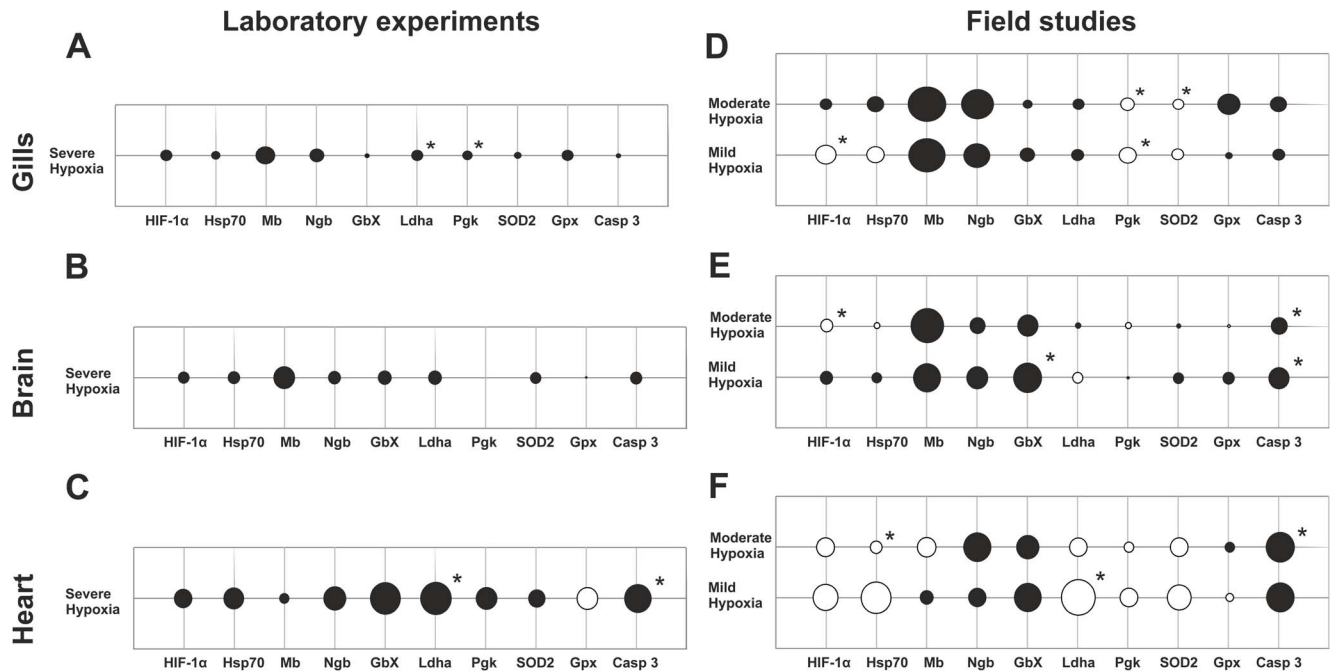

**Figure 4. Bubble charts of relative expression patterns of putatively hypoxia responsive genes in flounder under severe hypoxic conditions in laboratory experiments (A, B and C) and different hypoxic conditions in the Elbe estuary (C, D and E).** Evaluation of qRT-PCR results was performed with  $\Delta\Delta$  CT method by use of RPLP0 as a reference gene. All results of relative expression levels are represented in log base 2. The diameter of bubbles indicates the magnitude of gene expression. Black bubbles represent expression levels  $>0$ , pen bubbles represent expression levels  $<0$ , and crossing lines without a bubble signify no change in the expression level. Asterisks indicate significance at  $p<0.1$ . We analysed the expression pattern in three tissues of flounder: (A) and (D) gills, (B) and (E) brain and (C) and (F) heart. For more details see Table S2. doi:10.1371/journal.pone.0090778.g004

mild hypoxia; field experiments) (Fig. 2C). Hypoxia causes an increase of Ngb mRNA levels in all tissues of both species. The

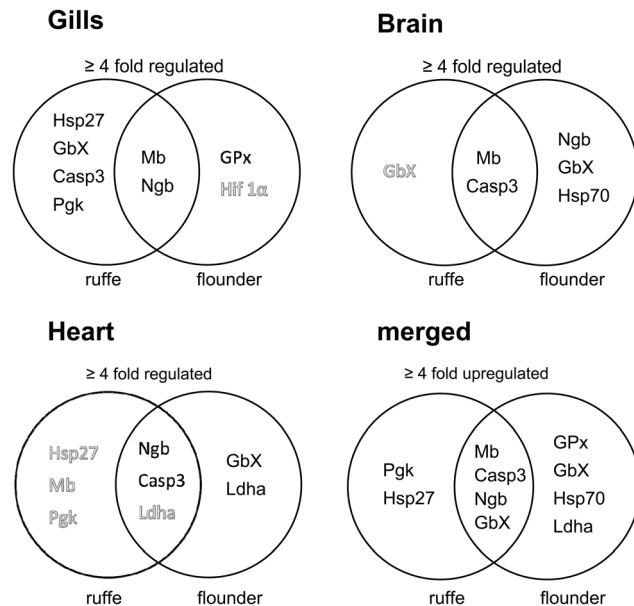

**Figure 5. Venn diagram of expression changes in different tissues of ruffe and flounder.** Black letters indicate genes that are upregulated and white letters indicate genes that are downregulated. Merged Venn diagram shows an overview of genes regulated more than fourfold in an overall comparison of the collected data. doi:10.1371/journal.pone.0090778.g005

strongest response was observed in the gills of both species from the Elbe estuary (up to 41-fold upregulation) (Fig. 3 and 4 A and D; Fig. 5). For GbX, we observed divergent changes of expression levels in the two fish species. In the brains, we found significantly elevated levels under hypoxic conditions in the flounder (up to 55-fold; field studies), but no changes in the ruffe. By contrast, similar tendencies were observed in the hearts of both species; here, transcript levels were elevated up to 4.5-fold in the ruffe (field studies) and up to sixfold in the flounder (laboratory experiments) (Fig. 3 and 4 C and F).

Likewise, the expression changes of the energy metabolism enzymes Pgk and Ldha showed divergent patterns (Fig. 3 and 4). Under severe hypoxic conditions, Ldha mRNA levels were elevated in all tissues of both species. In the ruffe we found enhanced Ldha levels in the gills (all hypoxic conditions; both experimental setups), while the levels significantly declined in the brains (mild and moderate hypoxia; field sampling) (Fig. 3A and B). In the flounder Ldha mRNA levels were slightly elevated in brains and showed significant upregulation in the hearts (severe hypoxia; laboratory experiments) (Fig. 4 D–F; Fig. 5). We found that Pgk was only affected in the gills of both species. Here, we observed that expression levels were significantly decreased in the flounder (about twofold), but significantly increased in the ruffe (about twofold) (Fig. 3 and 4 B and E).

The expression levels of antioxidant enzymes (Sod2; GPx) were mostly affected in the gills of both species. Here, we observed a 2.5-fold upregulation of Sod2 and GPx (severe hypoxia; laboratory experiments) and an up to sixfold upregulation of GPx in flounder (moderate hypoxia; field studies) (Fig. 3 and 4 A and D). The apoptosis enzyme Casp3 showed significant upregulation in the brains and hearts of the flounder (all hypoxic conditions; both experimental setups) (Fig. 4 D–F). The strongest expression

changes were observed in the brains (up to eightfold) and in the hearts (up to sevenfold) of the flounder (Fig 4 E and F). In the ruffe we found significantly up to fivefold increased levels of Casp3 in the hearts (mild and severe hypoxia; laboratory experiments) and similar tendencies in the brains (Figs. 3–5).

## Discussion

Oxygen availability is one of the most important environmental factors that influence fish biodiversity, particularly in coastal waters and estuaries. Hence, understanding the impact of oxygen limitations provides insights into the consequences for fish populations and whole ecosystems. We investigated the molecular responses in the ruffe (Perciformes) and the European flounder (Pleuronectiformes). These two bony fishes belong to different orders of Percomorpha that diverged about 100 million years ago in the Cretaceous period [37]. Thus, our approach allows the comparison of species with divergent life histories and which therefore have adapted independently to the estuarine environment.

In this study we focussed on changes in mRNA levels of putatively stress genes in response to hypoxic conditions. We must emphasize that there may be post-transcriptional and translational processes additionally regulating protein abundances and activities, and that therefore the observed changes in mRNA levels do not necessarily match the changes in protein levels or enzyme activities.

### Oxygen sensing and metabolic changes in response to hypoxia

In fish the perception of the oxygen concentration in the environment is mainly accomplished by specialized cells in the gills [38]. On the molecular level, O<sub>2</sub> sensing is mainly facilitated by the transcription factor Hif1 [39,40]. In mammals Hif-target genes are mainly involved in anaerobic energy metabolism, erythropoiesis and angiogenesis [41,42]. Analogous Hif-mediated mechanisms most likely also exist in fish [25,43,44,45]. Although Hif-mediated O<sub>2</sub>-sensing mainly occurs on a posttranslational level, additional transcriptional regulation has already been shown in several fish species [46,47,48]. In this study Hif1 $\alpha$ -levels were found upregulated in response to hypoxia in the gills of both the ruffe and the flounder. As the main tissue for oxygen sensing and because of their direct exchange with hypoxic waters, the gills are actually expected to experience the most pronounced changes.

Hypoxia poses a major problem the animal's energy budget because the most efficient ATP supply is accomplished by aerobic pathways. The metabolic responses to hypoxia may be distinguished by the means of meeting energy demands [49]. One strategy relies on the reduction of the energy demand by reducing protein synthesis, protein degradation and ion-pumping. This strategy is typical for anoxia-tolerant fish such as the goldfish [50,51]. On the molecular level genes required for the oxygen-dependent energy production (e.g., the TCA cycle or the respiratory chain) and protein translation were repressed [52,53]. Another strategy is the compensation of decreasing aerobic energy production by an increase of anaerobic ATP generation [44]. Therefore, genes coding for enzymes of the glycolytic pathway and fermentation were found more strongly expressed under hypoxic conditions in several fish species [43,48,53]. Our data provide evidence that both species, ruffe and flounder, meet their energy demands by the latter strategy as they show increased expression levels of the two glycolytic enzymes Ldha and Pdk, particularly under severe hypoxic conditions.

The energy production at the mitochondrial respiratory chain is known to be the major source of reactive oxygen species (ROS) [54]. Under low oxygen conditions electron transport slows down, which increases the reduction state of electron transporters and in turn favours superoxide production by increasing the electrical potential for single electron reduction of oxygen [55]. An increased formation of ROS may cause the damage of macromolecules [56]. The cellular homeostasis is protected by a defence system that consists of antioxidant compounds as well as antioxidant enzymes. In our assays, the levels of the antioxidant enzymes Sod2 and GPx were essentially unaffected by hypoxia. Welker et al. [57] emphasized that under hypoxic conditions there are different strategies to cope with ROS. While some species increase the activity and mRNA levels of antioxidant enzymes, others show little response to hypoxia. This might be explained by constitutively high levels of defence enzymes or insufficient hypoxia-tolerance [57]. Notably, only in the gills of ruffe Sod2 mRNA levels were found to be significantly increased, whereas we found minor upregulation of GPx in the gills of flounder from the Elbe estuary.

It should also be mentioned that thermal stress itself induces increased production of ROS in mitochondria because of a lower ADP to oxygen ratio, particularly in ectotherms [58,59]. Some studies on temperature effects show increasing activities of Sod but not GPx in fish [60,61,62]. Notably, Kammer et al. [61] found Sod activation prior to an upregulation of transcript levels and suggested that Sod activity is likely depends on posttranslational modification, which we do not see with our studies. Therefore, the mRNA levels of the antioxidant enzymes are at best a clue and we cannot actually exclude cellular response to oxidative stress in the hypoxic ruffe and flounder.

### The specific role of globins in the hypoxia-response of ruffe and flounder

Globins are small metallo-proteins that reversibly bind O<sub>2</sub> and thus are at the interface between the organism and its environment. Therefore, globins are a prime tool for studying the response of fish to hypoxia [44,63,64,65,66,67,68].

In addition to haemoglobin, which transports in the blood, there are four other globin types in the teleost fishes: Mb, Ngb, Cygb and GbX [69,70,71]. In most vertebrates, Mb appears to be restricted to the heart and skeletal muscles [33]. However, recent studies have suggested that Mb is also expressed in non-muscle tissue of various Cypriniformes [64,67,72] and medaka [68]. While by far the highest levels of Mb were observed in the hearts of the ruffe and the flounder (10<sup>8</sup> copies/ $\mu$ g total RNA), notable amounts of Mb mRNA were also found in the gills and in the brains of these species. Thus, there may be a specific function of Mb in these tissues, which may relate to the O<sub>2</sub> supply, the detoxification of ROS or the regulation of blood flow by scavenging NO [68,72]. Notably, there is little response of Mb to the hypoxic conditions we applied here in the hearts (Fig. 3 and 4). This may be explained at least in part by the already high levels of endogenous Mb mRNA in tissue (Fig. 2). Interestingly, Mb mRNA was found upregulated in non-muscle tissues of both species, with statistical significance in the gills of the ruffe. Whether this observation relates to a specific role of Mb in these tissues remains to be established.

Although its exact function is still uncertain, Ngb is considered to be involved in the oxidative metabolism of neurons [34,35]. It was therefore expected that Ngb levels were highest in the brains (~10<sup>8</sup> copies mRNA/ $\mu$ g total RNA; Fig. 2). These values are much higher than those found in the medaka [68], in which Ngb most likely only plays a minor role in hypoxia adaptation. Notably,



the levels of Ngb mRNA were among the highest found in this study and within the range of Mb in the hearts. This finding rather contradicts notions that Ngb is a lowly expressed gene [73,74], but confirms previous findings in zebrafish [75]. The relatively high levels of Ngb in gills and hearts may be explained by its expression in the peripheral nervous system [76]. However, in zebrafish Ngb has also been detected in the mitochondria-rich chloride cells of the gills, which presumably consume a large amount of energy [77]. The pattern of hypoxia response of Ngb in vertebrates is not clear [63]. In the flounder enhanced Ngb mRNA levels were found under hypoxia in all analysed tissues. In the ruffe, mRNA levels were elevated in the gills and significantly upregulated in the brains (Fig. 3). This corresponds to the findings in zebrafish [66], while no hypoxia response of Ngb was found in goldfish [67] and medaka [68]. Thus, the hypoxia response of Ngb in fish and its role in hypoxia may be species-specific.

GbX is a globin that is bound to the cell membrane [36] and has a widespread occurrence in the animal kingdom [78]. Most likely, GbX has no respiratory function, but may be either involved in the protection of membrane lipids or in some undefined signalling pathways [36]. In comparison to Mb and Ngb, GbX is rather lowly expressed (Fig. 2). The highest GbX levels were found in the brains, which is in agreement with its predominantly neuronal expression [36]. Hypoxia response of GbX has previously been investigated in the zebrafish, demonstrating its downregulation [66]. While in the ruffe no specific trend was observed, in the flounder hypoxia causes an increase of GbX mRNA in brains and hearts (Fig. 3). As with Ngb, hypoxia regulation of GbX may be species-specific, and the changes in flounder part of the enhanced hypoxia response found in this species.

### Species-specific responses of ruffe and flounder to hypoxia

Lifestyle is one of the main factors determining the hypoxia-tolerance of fish species. As stated above it is assumed that benthic/pelagic fish species like the flounder are more hypoxia tolerant, due to the natural oxygen deprivations in their habitat [29]. In fact, changes in gene expression in response to hypoxia were generally more pronounced in the flounder (Figs. 4 and 5). These results are further supported by MANOVA statistics, which showed significant effects of species on gene expression in gills and brains (Table S4B). Previous studies have already demonstrated a pronounced hypoxia tolerance of the flounder [79,80].

Hypoxia-adaptation in flounder is mediated by maintaining a constant O<sub>2</sub> extraction rate, which is accomplished, for example, by a high concentration of blood haemoglobin as well as a high O<sub>2</sub> affinity of hemoglobin [79,81,82]. Nevertheless, it must be taken into account that the oxygen supply to tissues depends on the cardiac performance. Comparisons of the heart rates and the stroke volumes between sluggish and active fish species resulted in 15-fold differences in the cardiac output. In general, resting cardiovascular performance of the flounder is lower compared to more active species. The stroke volume of the winter flounder (*Pleuronectes americanus*) for example is 1.5-fold lower than in Atlantic salmon (*Salmo salar*) [83]. Therefore tissues of the flounder might experience a lower oxygen supply at the same external conditions and the observed drastic changes of the expression of typical hypoxia response genes in the flounder can be interpreted as rapid defence and protection mechanisms at the cellular level [50]. This ability of an adequate response to hypoxic conditions facilitates living in coastal areas with large fluctuations in O<sub>2</sub> availability.

As an invasive species in Northern America, the ruffe has already been recognised as tolerant towards a wide range of

environmental stressors [84]. However, its response to hypoxia is less pronounced than in the flounder. This may be, for example, explained by the greater vertical mobility of the ruffe, which contrasts the strong demersal, and therefore putatively more hypoxic, habitat of the flounder.

### Hypoxia-response of fish is tissue-specific

We found notable differences in hypoxia response among tissues, both in terms of the pattern and the magnitude of response (Fig. 3–5). In the ruffe, the gill is by far the strongest responder (Fig. 3A) and the response in this tissue is also pronounced in the flounder (Fig. 3D). The gills are the prime site of gas exchange in fish and therefore the first target in the event of oxygen depletion [38]. In addition to their role in respiration, the gills are involved in ion exchange and acid-base regulation. These pathways are highly energy-demanding processes and therefore gills are known to be a highly oxygen-consuming tissue [85,86]. Hence, it is reasonable that gene expression changes either secure an adequate supply of O<sub>2</sub> to the mitochondria (Mb, Ngb) or fight oxidative stress (Sod2, GPx). Additionally slightly elevated mRNA levels of the apoptosis enzyme Casp3 were found in the gills of ruffe. On the one hand, this indicates a strong impact of hypoxia; on the other hand, it might be correlated with a common adaption process of carp species. An interaction of increasing apoptosis and decreasing proliferation levels, leads to a reduction in cell mass that results in an increase of the gill surface in this species [24].

Unlike in the ruffe, Casp 3 levels in the flounder suggest a stronger impact of hypoxia on the hypoxia-sensitive tissues of brains and heart. Another example is the heart of the flounder (Fig. 3F). Here, at moderate hypoxia, Mb and Ngb may enhance O<sub>2</sub> supply to muscle cells and neurons, respectively. At severe hypoxia, enhanced anaerobic ATP production, as indicated by the enhanced expression of Ldha and Pkg, are required to meet the energy demands. In addition, typical stress proteins (Hsps; Sod2) are enhanced to protect the heart from the side effects of hypoxia, such as the generation of ROS.

### Hypoxia-response is stronger in the field but laboratory experiments are a good proxy

Notably, gene expression in samples from the Elbe estuary and the controlled hypoxia experiments in the laboratory showed the same patterns of expression regulations, although the laboratory setup focussing on O<sub>2</sub> availability does not perfectly mirror the conditions in the Elbe environment (e.g., different temperatures). The results are supported by MANOVA, which showed a non-significant effect of the setup (field versus laboratory) on gene expression. Notable, the capture process itself seems to have no effect on gene expression levels in the ruffe or the flounder, as indicated by about the same absolute mRNA copy numbers in specimens from the Elbe and the laboratory (Fig. 2). Accordingly, the fish caught from the river most likely have similar gene expression patterns as those acclimated to laboratory conditions. However, expression changes of the hypoxia-responsive genes tended to be more pronounced in the field samples deriving from the Elbe estuary (Figs. 3 + 4). These differences in might be explained by additional extrinsic factors in the more complex natural environment, as already demonstrated in previous comparative studies [87,88,89].

It is well-established that besides the limited oxygen availability investigated here, other factors such as temperature and salinity affect the structure of the fish fauna [14]. For example, rising temperatures not only affect oxygen solubility itself but also cause an increase in the metabolic rate of ectotherms, which in turn leads to a higher oxygen demand [17]. Thus, hypoxia affects fish

more strongly at high temperatures. One notable example in our approach is the divergent expression of Hsp27 in the ruffe, which was found much more strongly expressed in the field. This might be explained, for example, by naturally occurring temperature fluctuations that might additionally influence Hsp27 levels [90,91].

It must also be considered that elevated temperatures in combination with high metal concentrations lead to tissue hypoxemia and aerobic energy deficiency in ectotherms [92]. Investigations on heavy metals and organic pollutants in the Elbe estuary showed highest levels between km 650.6 and 663.2, and highest predicted toxicity values between km 634 and 658 [93]. These stretches include two of the sampling stations used in this study (Pagensand NE km 662 and Wedel km 638, moderate hypoxia, see Table 1). Studies on the effects of pollutants and heavy metals on aquatic species have shown increased activities of antioxidant enzymes in the gills and livers, as well as increased occurrence of apoptotic cells in the gills [94,95,96,97]. As we observed enhanced levels of Sod2 in the gills of ruffe and GPx and Casp3 in the gills of flounder from field studies, effects resulting from the interaction of elevated temperatures and pollutants cannot be excluded.

In addition, we must admit that the actual exposure times to hypoxia of specimens sampled in the field are unknown. For example, some specimens might have been preconditioned to low DO, as the first hypoxic events in the Elbe estuary usually occur in early summer. Some fish species avoid hypoxia by migrating to better-aerated regions [98], suggesting that other sampled individuals might have been exposed to hypoxia only for a short period. Such variations are beyond our experimental control. In fact, divergent life histories of individual fish in the river Elbe may at least partially explain the observed higher standard deviations of mRNA copy numbers in the field samples.

However, gene expression patterns are largely the same in samples from the field and from the laboratory. Thus, despite the

additional factors that might influence gene expression changes in the field, our results suggest that laboratory experiments essentially reflect the actual patterns of hypoxia response in nature and are therefore suitable for studying the ecophysiology of fish at the molecular level.

## Supporting Information

**Table S1 Sequences of degenerated oligonucleotides.**  
(DOC)

**Table S2 Sequences of qRT-PCR oligonucleotides.**  
(DOC)

**Table S3 Statistical analysis (ANOVA) of qRT-PCR data.**  
(DOC)

**Table S4 MANOVA of qPCR data.** A. Effects of setups (field studies versus laboratory) on gene expression in the tissues of ruffe using Pillai's trace statistics. B. Effects of species specificity on gene expression within a tissue and referred to one hypoxic condition using Pillai's trace statistics.  
(DOC)

## Acknowledgments

We would like to thank Walter Zeeck, Klaus Zeeck and Dennis Eick for their help with sample collections. We thank Tara Moran and Miriam Götting for critical reading of the manuscript and Laura Gottschalk for her help with the laboratory experiments.

## Author Contributions

Conceived and designed the experiments: JT RT TB. Performed the experiments: JT. Analyzed the data: JT. Contributed reagents/materials/analysis tools: RT. Wrote the paper: JT TB.

## References

- Heip CHR, Goosen NK, Herman PMJ, Kromkamp J, Middelburg JJ, et al. (1995) Production and consumption of biological particles in temperate tidal estuaries. *Oceanogr Mar Biol* 33: 1–149.
- Valiela I, McClelland J, Hauxwell J, Behr PJ, Hersh D, et al. (1997) Macroalgal blooms in shallow estuaries: Controls and ecophysiological and ecosystem consequences. *Limnol Oceanogr* 42: 1105–1118.
- Diaz RJ (2001) Overview of hypoxia around the world. *J Environ Qual* 30: 275–281.
- Adams SM (2005) Assessing cause and effect of multiple stressors on marine systems. *Mar Pollut Bull* 51: 649–657.
- McLusky DS, Elliot M (2004) The estuarine ecosystem: ecology, threats and management. Oxford: Oxford biology. 216 p.
- Diaz RJ, Rosenberg R (2008) Spreading dead zones and consequences for marine ecosystems. *Science* 321: 926–929.
- Conley DJ, Carstensen J, Aertebjerg G, Christensen PB, Dalsgaard T, et al. (2007) Long-term changes and impacts of hypoxia in Danish coastal waters. *Ecol Appl* 17: S165–S184.
- Wu RS (2002) Hypoxia: from molecular responses to ecosystem responses. *Mar Pollut Bull* 45: 35–45.
- Rabalais NN, Turner RE, Scavia D (2002) Beyond science into policy: Gulf of Mexico hypoxia and the Mississippi River. *Bioscience* 52: 129–142.
- Rabalais NN, Turner RE, Wiseman WJ Jr (2001) Hypoxia in the Gulf of Mexico. *J Environ Qual* 30: 320–329.
- Stanley DW, Nixon SW (1992) Stratification and bottom-water hypoxia in the Pamlico river estuary. *Estuaries* 15: 270–281.
- Behrendt H, Bach M, Opitz D, Pagenkopf WD (2004) Maßgebliche anthropogene Einflüsse auf die Gewässerqualität; A. B. W. L., editors. Berlin: Weißensee Verlag.
- Hedges JI, Keil RG (1999) Organic geochemical perspectives on estuarine processes: sorption reactions and consequences. *Mar Chem* 65: 55–65.
- Thiel R (2011) Die Fischfauna europäischer Ästuare. Eine Strukturanalyse mit Schwerpunkt Tideelbe. München, Hamburg: Dölling und Galitz Verlag.
- Leal W, Holda A, Juurikas J, Lucius I, Krahn D, et al. (2006) The River Elbe in Hamburg - A description of the issues surrounding the dredging of the River Elbe and possible means of conflict resolution, case study report within the Coastman project. TuTech Innovation GmbH, Germany
- WWF (2005) Die Elbvertiefung von 1999. Tatsächliche und prognostizierte Auswirkungen. WWF Deutschland
- Gillooly JF, Brown JH, West GB, Savage VM, Charnov EL (2001) Effects of size and temperature on metabolic rate. *Science* 293: 2248–2251.
- Lefrancois C, Claireaux G (2003) Influence of ambient oxygenation and temperature on metabolic scope and scope for heart rate in the common sole *Solea solea*. *Mar Ecol Prog Ser* 259: 273–284.
- Nilsson GE, Renshaw GM (2004) Hypoxic survival strategies in two fishes: extreme anoxia tolerance in the North European crucian carp and natural hypoxic preconditioning in a coral-reef shark. *J Exp Biol* 207: 3131–3139.
- Roberts JJ, Hook TO, Ludsin SA, Pothoven SA, Vanderploeg HA, et al. (2009) Effects of hypolimnetic hypoxia on foraging and distributions of Lake Erie yellow perch. *J Exp Mar Biol Ecol* 381: S132–S142.
- Bushnell PG, Brill RW (1992) Oxygen transport and cardiovascular responses in skipjack tuna (*Katsuwonus pelamis*) and yellowfin tuna (*Thunnus albacares*) exposed to acute hypoxia. *J Comp Physiol B* 162: 131–143.
- Nilsson GE (2007) Gill remodeling in fish - a new fashion or an ancient secret? *J Exp Biol* 210: 2403–2409.
- Sollid J, De Angelis P, Gunderson K, Nilsson GE (2003) Hypoxia induces adaptive and reversible gross morphological changes in crucian carp gills. *J Exp Biol* 206: 3667–3673.
- Sollid J, Nilsson GE (2006) Plasticity of respiratory structures—adaptive remodeling of fish gills induced by ambient oxygen and temperature. *Respir Physiol Neurobiol* 154: 241–251.
- Richards JG (2009) Fish physiology. In: Richards JG, Farrell A, Brauner C, editors. Hypoxia: Elsevier.
- Rochard E, Elie P (1994) La macrofaune aquatique de l'estuaire de la Gironde. Contribution au livre blanc de l'Agence de l'Eau Adour Garonne. In: Guillaud J-L, MaJ-F, editor. État des connaissances sur l'estuaire de la Gironde. Bordeaux, France: Agence de l'Eau Adour-Garonne. pp. 115 p.
- Kottelat M, Freyhof J (2007) Handbook of European freshwater fishes. Switzerland: Publications Kottelat. 646 p.
- Nienhuis PH (2008) Environmental History of the Rhine-Meuse Delta. An ecological story on evolving human-environmental relations coping with climate change and sea-level rise. Netherlands: Springer. 660 p.

29. Chapman IJ, McKenzie D (2009) Behavioural responses and ecological consequences. In: Richards JG, Farrell AP, Brauner CJ, editors. Hypoxia in Fishes. San Diego, CA: Elsevier. pp. 26–77.
30. Tichopad A, Kitchen R, Riedmaier I, Becker C, Stahlberg A, et al. (2009) Design and optimization of reverse-transcription quantitative PCR experiments. *Clin Chem* 55: 1816–1823.
31. Livak KJ, Schmittgen TD (2001) Analysis of relative gene expression data using real-time quantitative PCR and the  $2^{-\Delta\Delta C_T}$  method. *Methods* 25: 402–408.
32. Bray JH, Maxwell SE (1985) *Multivariate Analysis of Variance*. Newbury Park, CA: SAGE Publications.
33. Wittenberg JB, Wittenberg BA (2003) Myoglobin function reassessed. *J Exp Biol* 206: 2011–2020.
34. Burmester T, Hankeln T (2009) What is the function of neuroglobin? *J Exp Biol* 212: 1423–1428.
35. Burmester T, Weich B, Reinhardt S, Hankeln T (2000) A vertebrate globin expressed in the brain. *Nature* 407: 520–523.
36. Blank M, Wollberg J, Gerlach F, Reimann K, Roesner A, et al. (2011) A membrane-bound vertebrate globin. *PLoS ONE* 6: e25292.
37. Near TJ (2009) Conflict and resolution between phylogenies inferred from molecular and phenotypic data sets for hagfish, lampreys, and gnathostomes. *J Exp Zool B Mol Dev Evol* 312: 749–761.
38. Evans DH, Piermarini PM, Choc KP (2005) The multifunctional fish gill: dominant site of gas exchange, osmoregulation, acid-base regulation, and excretion of nitrogenous waste. *Physiol Rev* 85: 97–177.
39. Bunn HF, Poyton RO (1996) Oxygen sensing and molecular adaptation to hypoxia. *Physiol Rev* 76: 839–885.
40. Semenza GL, Roth PH, Fang HM, Wang GL (1994) Transcriptional regulation of genes encoding glycolytic enzymes by hypoxia-inducible factor 1. *J Biol Chem* 269: 23757–23763.
41. Benita Y, Kikuchi H, Smith AD, Zhang MQ, Chung DC, et al. (2009) An integrative genomics approach identifies Hypoxia Inducible Factor-1 (HIF-1)-target genes that form the core response to hypoxia. *Nucleic Acids Res* 37: 4587–4602.
42. Semenza GL, Shimoda LA, Prabhakar NR (2006) Regulation of gene expression by HIF-1. *Novartis Foundation Symp* 272: 2–8; discussion 8–14, 33–16.
43. Gracey AY, Troll JV, Somero GN (2001) Hypoxia-induced gene expression profiling in the euryoxic fish *Gillichthys mirabilis*. *Proc Natl Acad Sci USA* 98: 1993–1998.
44. Nikinmaa M, Rees BB (2005) Oxygen-dependent gene expression in fishes. *Am J Physiol Regul Integr Comp Physiol* 288: R1079–1090.
45. Semenza GL (1998) Hypoxia-inducible factor 1: master regulator of O<sub>2</sub> homeostasis. *Curr Opin Genet Dev* 8: 588–594.
46. Law SHW, Wu RSS, Ng PKS, Yu RMK, Kong RYC (2006) Cloning and expression analysis of two distinct HIF- $\alpha$  isoforms - gHIF- $\alpha$  and gHIF-4 $\alpha$  - from the hypoxia-tolerant grass carp, *Ctenopharyngodon idellus*. *BMC Mol Biol* 7.
47. Rissanen E, Tranberg HK, Sollid J, Nilsson GE, Nikinmaa M (2006) Temperature regulates hypoxia-inducible factor-1 (HIF-1) in a poikilothermic vertebrate, crucian carp (*Carassius carassius*). *J Exp Biol* 209: 994–1003.
48. van der Meer DL, van den Thillart GE, Witte F, de Bakker MA, Besser J, et al. (2005) Gene expression profiling of the long-term adaptive response to hypoxia in the gills of adult zebrafish. *Am J Physiol Regul Integr Comp Physiol* 289: R1512–1519.
49. Boutilier RG (2001) Mechanisms of cell survival in hypoxia and hypothermia. *J Exp Biol* 204: 3171–3181.
50. Hochachka PW, Buck LT, Doll CJ, Land SC (1996) Unifying theory of hypoxia tolerance: molecular/metabolic defense and rescue mechanisms for surviving oxygen lack. *Proc Natl Acad Sci USA* 93: 9493–9498.
51. Van Ginneken VJT, Van Cauberghe P, Nieveen M, Balm P, Van Den Thillart G, et al. (1997) Influence of hypoxia exposure on the energy metabolism of common carp (*Cyprinus Carpio L.*). *Neth J Zool* 48: 65–82.
52. Padilla PA, Roth MB (2001) Oxygen deprivation causes suspended animation in the zebrafish embryo. *Proc Natl Acad Sci USA* 98: 7331–7335.
53. Ton C, Stamatiou D, Liew CC (2003) Gene expression profile of zebrafish exposed to hypoxia during development. *Physiol Genomics* 13: 97–106.
54. Turrens JF (2003) Mitochondrial formation of reactive oxygen species. *J Physiol (Lond)* 552: 335–344.
55. Murphy MP (2009) How mitochondria produce reactive oxygen species. *Biochem J* 417: 1–13.
56. Sies H (1996) Oxidative stress: Oxidants and antioxidants. *J Physiol (Lond)* 491P: S2–S2.
57. Welker AF, Moreira DC, Campos EG, Hermes-Lima M (2013) Role of redox metabolism for adaptation of aquatic animals to drastic changes in oxygen availability. *Comp Biochem Physiol A Mol Integr Physiol* 165: 384–404.
58. Abele D, Heise K, Portner HO, Puntarulo S (2002) Temperature-dependence of mitochondrial function and production of reactive oxygen species in the intertidal mud clam *Mya arenaria*. *J Exp Biol* 205: 1831–1841.
59. Heise K, Puntarulo S, Portner HO, Abele D (2003) Production of reactive oxygen species by isolated mitochondria of the Antarctic bivalve *Laternula elliptica* (King and Broderip) under heat stress. *Comp Biochem Physiol C Toxicol Pharmacol* 134: 79–90.
60. Hemmer-Brepson C, Replumaz L, Romestaing C, Voituron Y, Daufresne M (2013) Non-stressful temperature effect on oxidative balance and life history traits in adults fish (*Oryzias latipes*). *J Exp Biol*: in press.
61. Kammer AR, Orczewska JI, O'Brien KM (2011) Oxidative stress is transient and tissue specific during cold acclimation of threespine stickleback. *J Exp Biol* 214: 1248–1256.
62. Lushchak VI, Bagnyukova TV (2006) Temperature increase results in oxidative stress in goldfish tissues. 2. Antioxidant and associated enzymes. *Comp Biochem Physiol C Toxicol Pharmacol* 143: 36–41.
63. Burmester T, Gerlach F, Hankeln T (2007) Regulation and role of neuroglobin and cytoglobin under hypoxia. *Hypoxia and the Circulation* 618: 169–180.
64. Fraser J, de Mello LV, Ward D, Rees HH, Williams DR, et al. (2006) Hypoxia-inducible myoglobin expression in nonmuscle tissues. *Proc Natl Acad Sci USA* 103: 2977–2981.
65. Nikinmaa M (2001) Haemoglobin function in vertebrates: evolutionary changes in cellular regulation in hypoxia. *Respir Physiol* 128: 317–329.
66. Roesner A, Hankeln T, Burmester T (2006) Hypoxia induces a complex response of globin expression in zebrafish (*Danio rerio*). *J Exp Biol* 209: 2129–2137.
67. Roesner A, Mitz SA, Hankeln T, Burmester T (2008) Globins and hypoxia adaptation in the goldfish, *Carassius auratus*. *FEBS J* 275: 3633–3643.
68. Wawrowski A, Gerlach F, Hankeln T, Burmester T (2011) Changes of globin expression in the Japanese medaka (*Oryzias latipes*) in response to acute and chronic hypoxia. *J Comp Physiol B Biochem Syst Environ Physiol* 181: 199–208.
69. Avenius C, Hankeln T, Burmester T (2001) Neuroglobins from the zebrafish *Danio rerio* and the pufferfish *Tetraodon nigroviridis*. *Biochem Biophys Res Commun* 287: 418–421.
70. Burmester T, Ebner B, Weich B, Hankeln T (2002) Cytoglobin: a novel globin type ubiquitously expressed in vertebrate tissues. *Mol Biol Evol* 19: 416–421.
71. Roesner A, Fuchs C, Hankeln T, Burmester T (2005) A globin gene of ancient evolutionary origin in lower vertebrates: evidence for two distinct globin families in animals. *Mol Biol Evol* 22: 12–20.
72. Cossins AR, Williams DR, Foulkes NS, Berenbrink M, Kipar A (2009) Diverse cell-specific expression of myoglobin isoforms in brain, kidney, gill and liver of the hypoxia-tolerant carp and zebrafish. *J Exp Biol* 212: 627–638.
73. Brunori M, Giuffrè A, Nienhaus K, Nienhaus GU, Scandurra FM, et al. (2005) Neuroglobin, nitric oxide, and oxygen: functional pathways and conformational changes. *Proc Natl Acad Sci USA* 102: 8483–8488.
74. Fago A, Hundahl C, Malte H, Weber RE (2004) Functional properties of neuroglobin and cytoglobin. Insights into the ancestral physiological roles of globins. *IUBMB Life* 56: 689–696.
75. Tiedke J, Gerlach F, Mitz SA, Hankeln T, Burmester T (2011) Ontogeny of globin expression in zebrafish (*Danio rerio*). *J Comp Physiol B Biochem Syst Environ Physiol* 181: 1011–1021.
76. Reuss S, Saaler-Reinhardt S, Weich B, Wystub S, Reuss MH, et al. (2002) Expression analysis of neuroglobin mRNA in rodent tissues. *Neuroscience* 115: 645–656.
77. Fuchs C, Heib V, Kiger L, Haberkamp M, Roesner A, et al. (2004) Zebrafish reveals different and conserved features of vertebrate neuroglobin gene structure, expression pattern, and ligand binding. *J Biol Chem* 279: 24116–24122.
78. Blank M, Burmester T (2012) Widespread occurrence of N-terminal acylation in animal globins and possible origin of respiratory globins from a membrane-bound ancestor. *Mol Biol Evol* 29: 3553–3561.
79. Jorgensen JB, Mustafa T (1980) The effect of hypoxia on carbohydrate-metabolism in flounder (*Platichthys flesus L.*). 1. Utilization of glycogen and accumulation of glycolytic end products in various tissues. *Comp Biochem Physiol B Biochem Mol Biol* 67: 243–248.
80. Waede Mv (1954) Beobachtungen zur osmotischen, chemischen und thermischen Resistenz der Scholle *Pleuronectes platessa* und Flunder *Platichthys flesus*. *Kieler Meeresforschung* 10: 58–67.
81. Steffensen JF, Lomholt JP, Johansen K (1982) Gill ventilation and O<sub>2</sub> extraction during graded hypoxia in 2 ecologically distinct species of flatfish, the flounder (*Platichthys flesus*) and the plaice (*Pleuronectes platessa*). *Environ Biol Fishes* 7: 157–163.
82. Weber RE, Dewilde JAM (1975) Oxygenation properties of hemoglobins from flatfish plaice (*Pleuronectes platessa*) and flounder (*Platichthys flesus*). *J Comp Physiol* 101: 99–110.
83. Mendonça PC, Gamperl AK (2009) Nervous and humoral control of cardiac performance in the winter flounder (*Pleuronectes americanus*). *J Exp Biol* 212: 934–944.
84. Ogle DH (1998) A synopsis of the biology and life history of ruffe. *J Great Lakes Res* 24: 170–185.
85. Claiborne JB, Edwards SL, Morrison-Shetlar AI (2002) Acid-base regulation in fishes: Cellular and molecular mechanisms. *J Exp Zool* 293: 302–319.
86. Lyndon AR (1994) A method for measuring oxygen consumption in isolated perfused gills. *J Fish Biol* 44: 707–715.
87. Connor KM, Gracey AY (2011) Circadian cycles are the dominant transcriptional rhythm in the intertidal mussel *Mytilus californianus*. *Proc Natl Acad Sci U S A* 108: 16110–16115.
88. Thomas P, Rahman MS, Khan IA, Kummer JA (2007) Widespread endocrine disruption and reproductive impairment in an estuarine fish population exposed to seasonal hypoxia. *Proc Biol Sci* 274: 2693–2701.
89. Todgham AE, Iwama GK, Schulte PM (2006) Effects of the natural tidal cycle and artificial temperature cycling on Hsp levels in the tidepool sculpin *Oligocottus maculosus*. *Physiol Biochem Zool* 79: 1033–1045.

90. Podrabsky JE, Somero GN (2004) Changes in gene expression associated with acclimation to constant temperatures and fluctuating daily temperatures in an annual killifish *Austrofundulus limnaeus*. *J Exp Biol* 207: 2237–2254.
91. Yang QL, Yao CL, Wang ZY (2012) Acute temperature and cadmium stress response characterization of small heat shock protein 27 in large yellow croaker, *Larimichthys crocea*. *Comp Biochem Physiol C Toxicol Pharmacol* 155: 190–197.
92. Sokolova IM, Lannig G (2008) Interactive effects of metal pollution and temperature on metabolism in aquatic ectotherms: implications of global climate change. *Clim Res* 37: 181–201.
93. Wetzel MA, Wahrendorf D-S, von der Ohe PC (2013) Sediment pollution in the Elbe estuary and its potential toxicity at different trophic levels. *Sci Total Environ* 449: 199–207.
94. Geret F, Serafim A, Barreira L, Bebianno MJ (2002) Effect of cadmium on antioxidant enzyme activities and lipid peroxidation in the gills of the clam *Ruditapes decussatus*. *Biomarkers* 7: 242–256.
95. Kubrak OI, Atamaniuk TM, Husak VV, Drohomlyretska IZ, Storey JM, et al. (2012) Oxidative stress responses in blood and gills of *Carassius auratus* exposed to the mancozeb-containing carbamate fungicide Tattoo. *Ecotoxicol Environ Saf* 85: 37–43.
96. Mazon AF, Cerqueira CCC, Fernandes MN (2002) Gill Cellular Changes Induced by Copper Exposure in the South American Tropical Freshwater Fish *Prochilodus scrofa*. *Environ Res* 88: 52–63.
97. Rodríguez-Ariza A, Peinado J, Pueyo C, López-Barea J (1993) Biochemical Indicators of Oxidative Stress in Fish from Polluted Littoral Areas. *Can J Fish Aquat Sci* 50: 2568–2573.
98. Tyler RM, Targett TE (2007) Juvenile weakfish *Cynoscion regalis* distribution in relation to diel-cycling dissolved oxygen in an estuarine tributary. *Mar Ecol Prog Ser* 333: 257–269.
99. Eick D (2012) First confirmed record of lozanos goby, *Pomatoschistus lozanoi* (de Buen, 1923) (Teleostei: Gobiidae), in the Elbe estuary. *J Appl Ichthyol* 28: 637–640.
